# Supplementary material for: A simple fluorescence-based lateral flow test platform for rapid influenza B virus screening
Source: Royal Society of Chemistry journal article supplement (doi:10.1039/d0ay01988g), 2021-01-01
Supplement: d0ay01988g1.pdf [file d0ay01988g1.pdf]

**Electronic Supplementary Information (ESI)**

**A simple fluorescence-based lateral flow test platform for rapid influenza B virus screening**

Natpapas Wiriyaichai<sup>a</sup>, Siriwan Sirikaew<sup>a</sup>, Suwussa Bamrungsap<sup>a</sup>, Thanchanok Limcharoen<sup>a</sup>,  
Pannarai Polkankosit<sup>b</sup>, Pimporn Roeksrungruang<sup>a</sup>, Kanyawan Ponlamuangdee<sup>a</sup>

**Figure S1** TEM image of the Cy5-SiNPs before antibody conjugation (upper panel) and (b) characterization of the particles before and after antibody conjugation using dynamic light scattering (lower panel).

**Figure S2** Element distribution analysis within the T-line position in a presence (upper panel) and absence (lower panel) of influenza B virus proteins was performed using EDX analysis.

**Figure S3** Fluorescence signal intensity and fluorescence image analysis of the test device corresponded to different antibody/particle ratios.

**Figure S4** Fluorescence signal intensity and fluorescence image analysis of the test device corresponded to different reaction time, including 10, 20, and 30 min.

**Figure S5** A linear relationship between the relative signal intensity and influenza B virus protein concentrations. Arrow indicates limit of detection (LOD)

**Figure S6** A linear relationship between the relative signal intensity and influenza B virus proteins in viral transport media (VTM) ranging from 0.14 to 17.5 µg per test. Arrow indicates LOD

1  
2  
3  
4  
5  
6  
7  
8  
9  
10  
11  
12  
13  
14

**Figure S1**

|                | Size (nm) | Charge (mV) |
|----------------|-----------|-------------|
| SiNP-COOH      | 152 ± 6   | -46 ± 3     |
| SiNP-MAb Flu B | 200 ± 1   | -23 ± 3     |

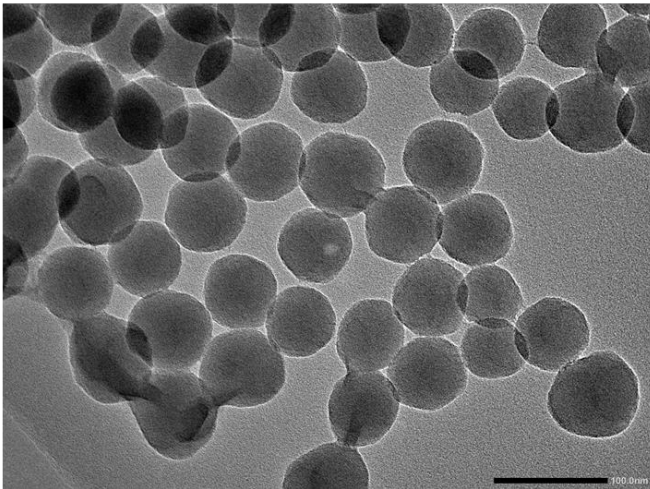

Figure S2

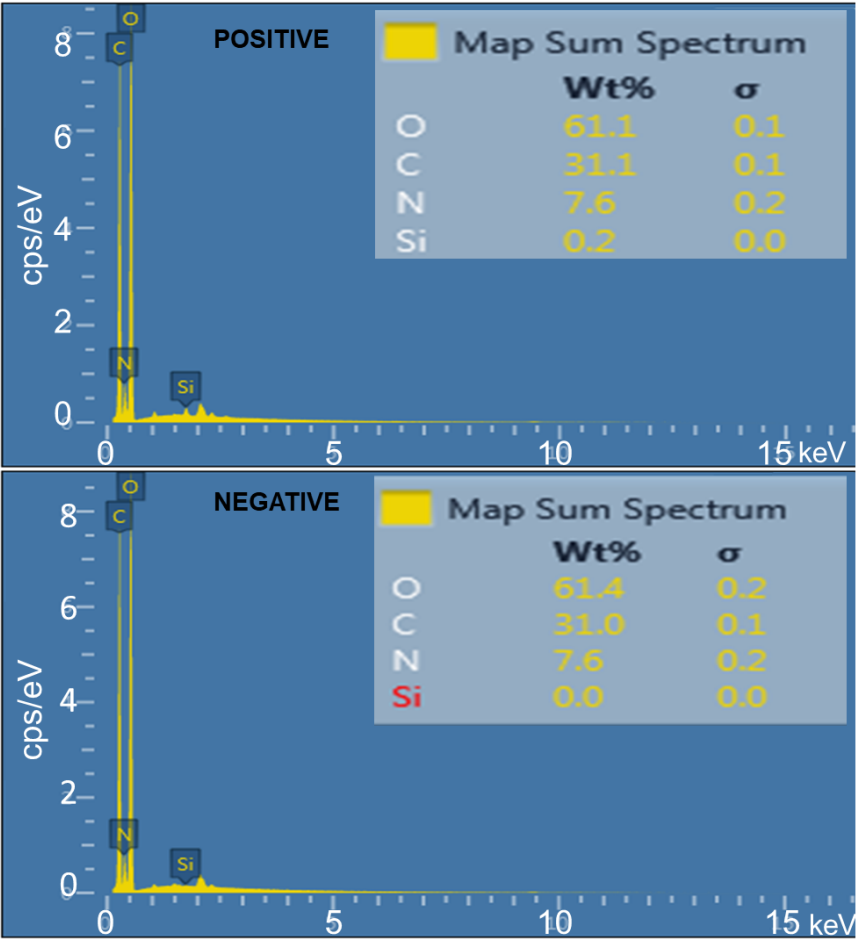

**Figure S3**

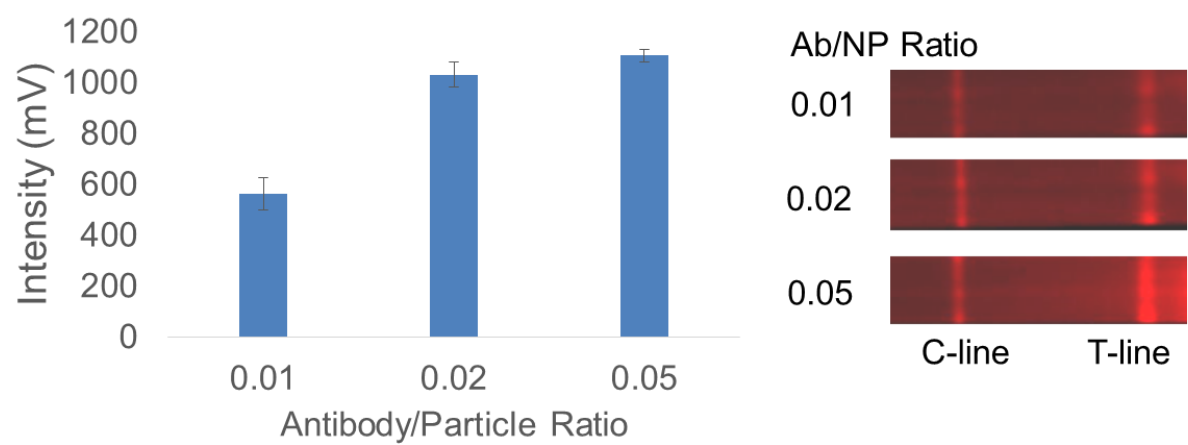

**Figure S4**

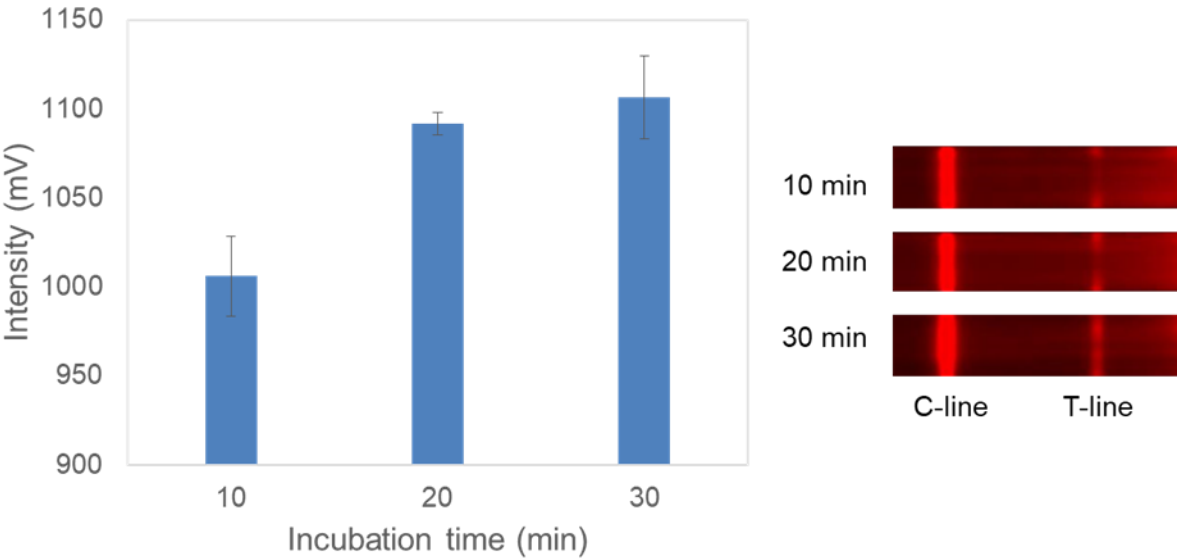

Figure S5

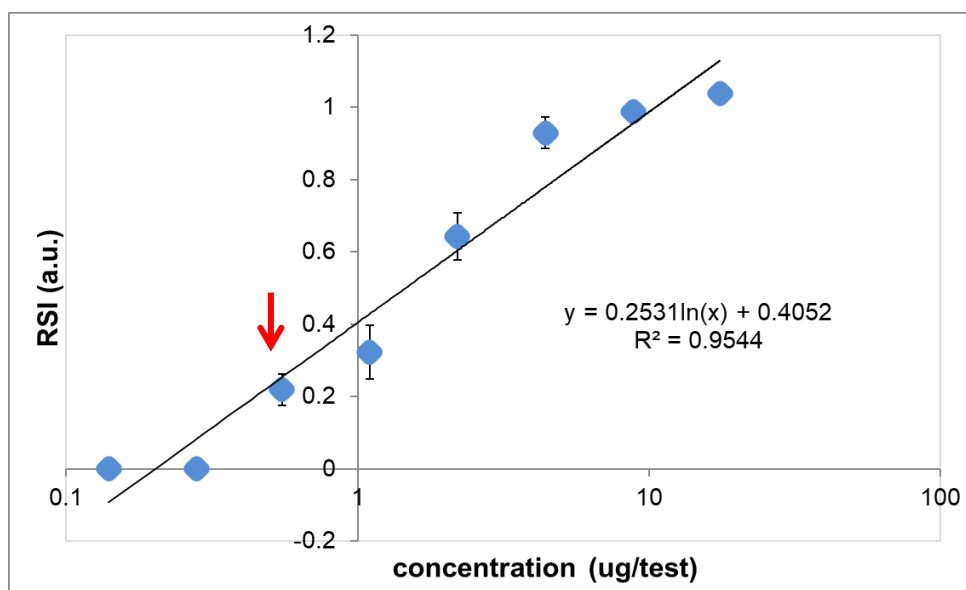

1

2

3 **Figure S6**

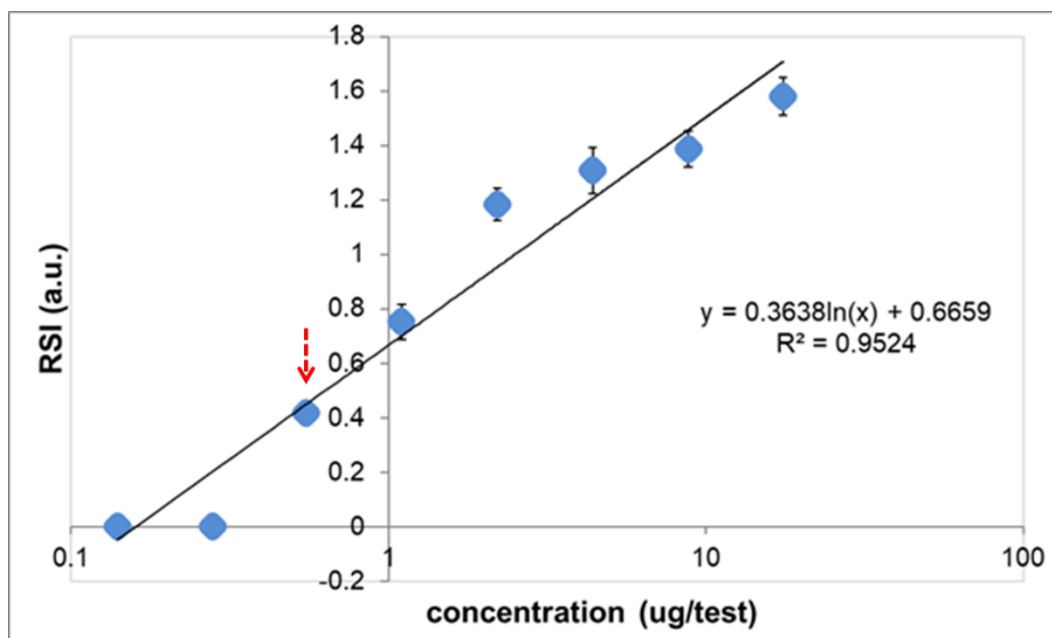

4

5

6
